# Supplementary material
Source: PubMed Central journal article supplement (PMC6663110)
Supplement: NIHMS1038138-supplement-Appendix.pdf [file NIHMS1038138-supplement-Appendix.pdf]

# Online Appendix to “BIC and Alternative Bayesian Information Criteria in the Selection of Structural Equation Models”

Kenneth A. Bollen\*    Jeffrey J. Harden†    Surajit Ray‡    Jane Zavisca§

## 1 IBIC vs. Kashyap’s (1982) BIC

An important question with any Bayes Factor approximation is how much complexity should be retained and how much should be omitted. In using  $\log(\frac{N}{2\pi})$  in its approximation, IBIC is slightly more complex than Kashyap’s (1982) use of  $\log(N)$  (KBIC). The empirical question then becomes whether the added complexity is worthwhile. We re-ran our simulations substituting  $\log(N)$  rather than  $\log(\frac{N}{2\pi})$ . The results, which are displayed in Figure A.1, indicate that the  $\log(\frac{N}{2\pi})$  from IBIC consistently outperforms KBIC’s  $\log(N)$  with respect to selection of the true model. This is especially evident at smaller sample sizes. For example, at  $N = 250$  the IBIC selections of the true model are 10 (SIM1) and 18 (SIM2) percentage points higher than KBIC’s selections. Not surprisingly, as the sample size increases the two approximations become increasingly similar and both select the true model nearly 100% of the time.

## 2 SIM2 Percentage Selections of the True Model

Figure A.2 presents the percentage selection of the true model for all fit measures in SIM2.

## 3 Model Selection Results with No True Model

Tables A.1 and A.2 present the median and IQR values for BIC, HBIC, IBIC, and SPBIC in SIM1 with  $N = 250$  and 5000.

Tables A.3–A.7 present the median and IQR values for the four IC measures in SIM2 at all five sample sizes.

Figures A.3–A.6 present SIM2 box-and-whiskers plots for each IC measure for individual models for  $N = 100, 250, 500,$  and 1000.

---

\*H.R. Immerwahr Distinguished Professor, Department of Sociology, University of North Carolina at Chapel Hill, Chapel Hill, NC 27599, bollen@unc.edu

†Assistant Professor, Department of Political Science, University of Colorado Boulder, Boulder, CO 80309, jeffrey.harden@colorado.edu

‡Senior Lecturer, School of Mathematics & Statistics, University of Glasgow, Glasgow, G12 8QQ, Scotland, surajit.ray@glasgow.ac.uk

§Associate Professor, Department of Sociology, University of Arizona, Tucson, AZ 85721, janez@u.arizona.edu

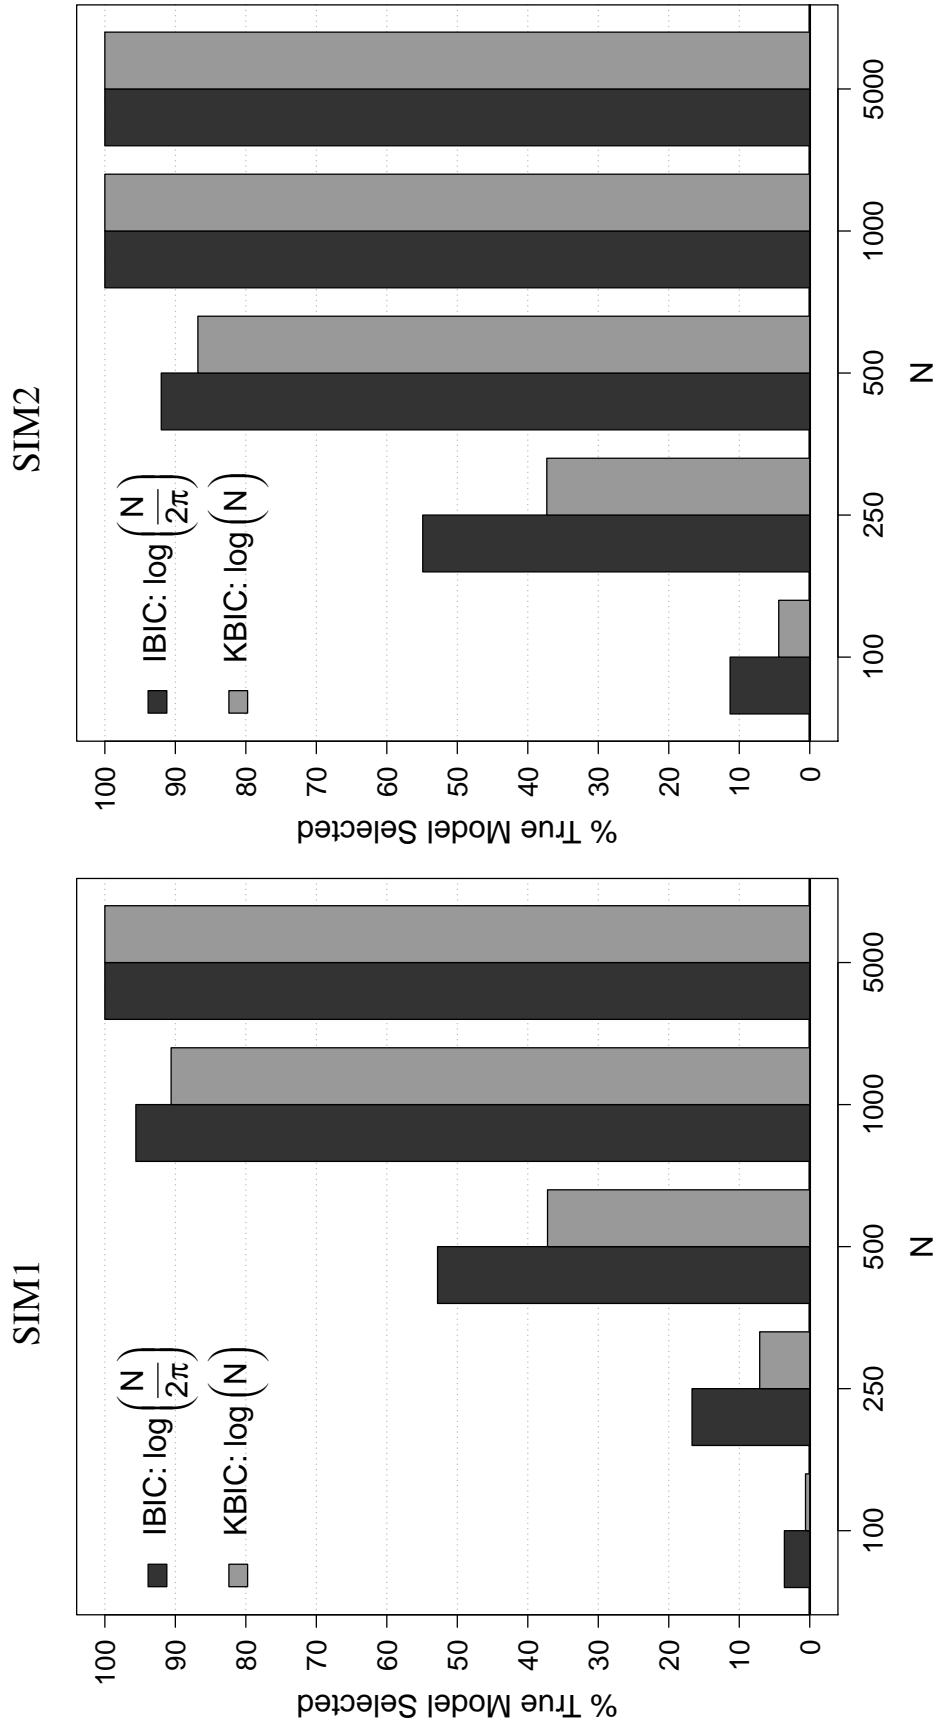

Figure A.1: IBIC vs. KBIC Percentage Selections of the True Model

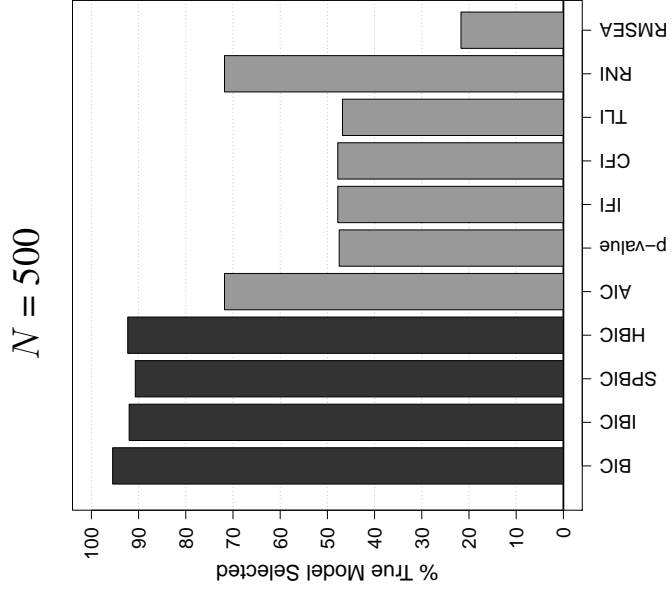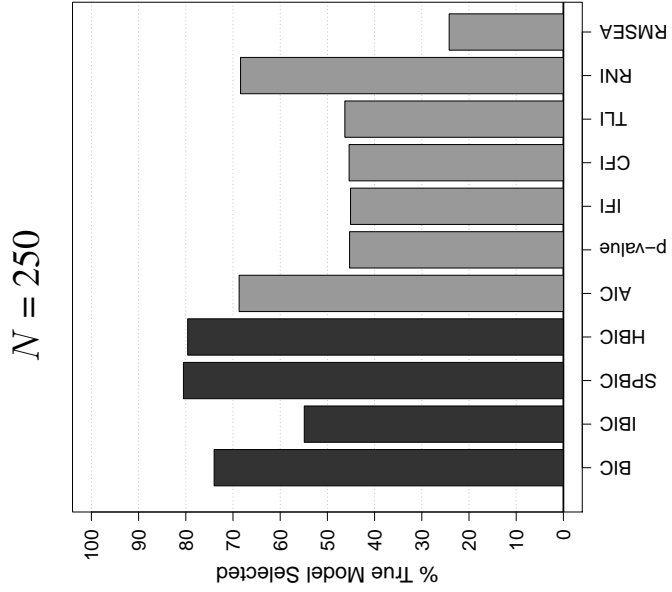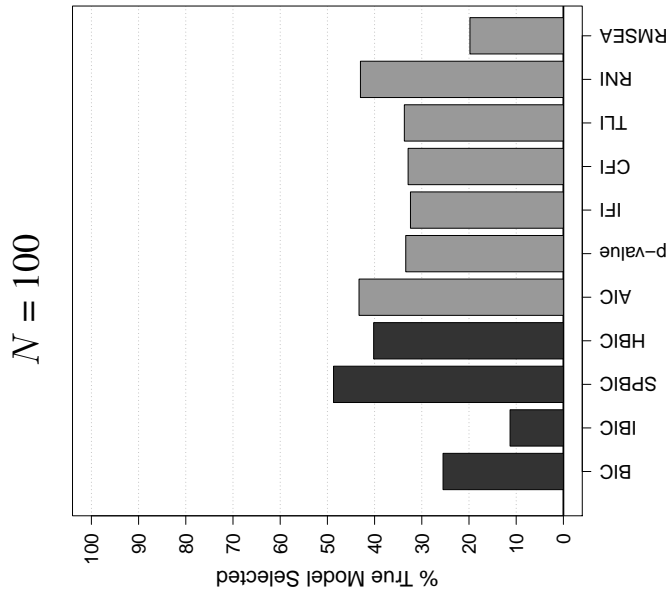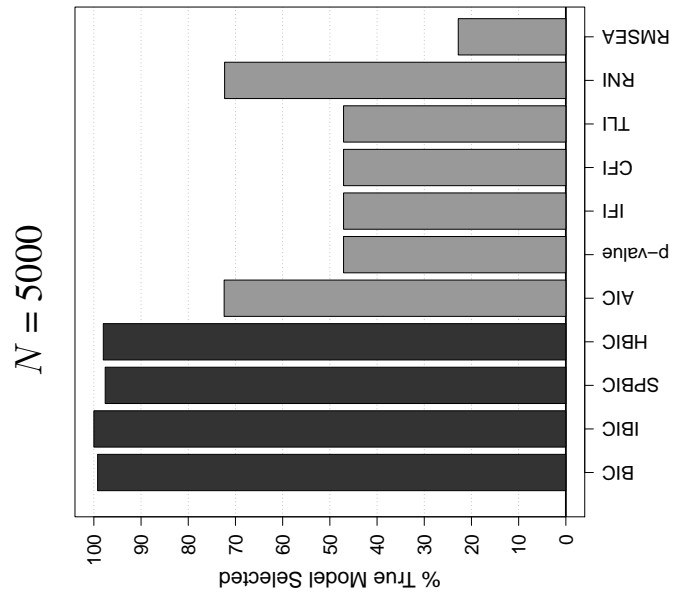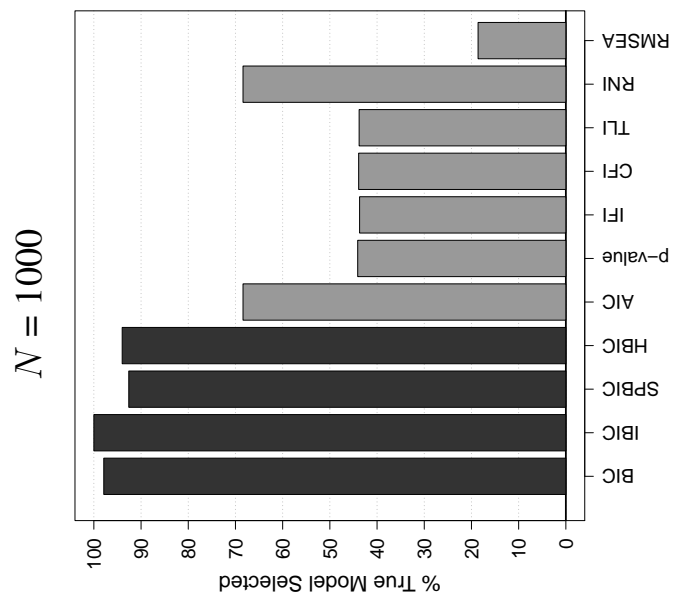

Figure A.2: SIM2 Percentage Selections of the True Model

Table A.1: SIM1 Fit Statistic Quantiles and Median Ranks with No True Model ( $N = 250$ )

| Models:      | Extra Parameters |      |       | Dropped Loadings |       |       | Dropped and Extra |       |        | Dropped $\beta$ Only<br>M10 |       |
|--------------|------------------|------|-------|------------------|-------|-------|-------------------|-------|--------|-----------------------------|-------|
|              | M6               | M8   | M9    | M2               | M3    | M4    | M5                | M7    | M11    |                             | M12   |
| <b>BIC</b>   |                  |      |       |                  |       |       |                   |       |        |                             |       |
| Median       | 5.06             | 5.05 | 9.65  | 1.27             | 0.67  | 9.07  | 2.99              | 64.80 | 113.33 | 5.36                        | 92.73 |
| IQR          | 1.15             | 1.33 | 2.42  | 6.95             | 9.11  | 13.58 | 8.56              | 26.82 | 33.87  | 2.38                        | 26.49 |
| Median Rank  | 4                | 4    | 7     | 3                | 2     | 7     | 4                 | 9     | 11     | 5                           | 10    |
| <b>HBIC</b>  |                  |      |       |                  |       |       |                   |       |        |                             |       |
| Median       | 3.22             | 3.21 | 5.97  | 3.10             | 4.35  | 14.58 | 4.82              | 64.80 | 120.68 | 3.52                        | 96.41 |
| IQR          | 1.15             | 1.33 | 2.42  | 6.95             | 9.11  | 13.58 | 8.56              | 26.82 | 33.87  | 2.38                        | 26.49 |
| Median Rank  | 3                | 3    | 6     | 4                | 5     | 8     | 5                 | 9     | 11     | 4                           | 10    |
| <b>IBIC</b>  |                  |      |       |                  |       |       |                   |       |        |                             |       |
| Median       | 9.94             | 7.36 | 16.99 | -1.10            | -3.89 | 1.71  | 3.67              | 61.85 | 98.18  | 9.07                        | 85.71 |
| IQR          | 1.06             | 1.30 | 2.34  | 6.80             | 8.74  | 12.77 | 7.60              | 26.42 | 32.12  | 2.45                        | 26.37 |
| Median Rank  | 6                | 5    | 8     | 3                | 1     | 3     | 4                 | 9     | 11     | 6                           | 10    |
| <b>SPBIC</b> |                  |      |       |                  |       |       |                   |       |        |                             |       |
| Median       | 2.77             | 2.88 | 5.17  | 3.55             | 4.73  | 14.75 | 4.21              | 67.23 | 123.28 | 14.31                       | 92.21 |
| IQR          | 1.13             | 1.28 | 2.31  | 6.84             | 8.80  | 13.49 | 8.29              | 26.46 | 33.10  | 5.07                        | 26.04 |
| Median Rank  | 3                | 3    | 4     | 4                | 5     | 8     | 4                 | 9     | 11     | 7                           | 10    |

*Note:* Cells report median and interquartile range (IQR) values of the fit statistics across the simulations, with median model ranks below. Lower numbers indicate better fit.

Table A.2: SIM1 Fit Statistic Quantiles and Median Ranks with No True Model ( $N = 5000$ )

| Models:      | Extra Parameters |       |       | Dropped Loadings |        |        | Dropped and Extra |         |         | Dropped $\beta$ Only |         |
|--------------|------------------|-------|-------|------------------|--------|--------|-------------------|---------|---------|----------------------|---------|
|              | M6               | M8    | M9    | M2               | M3     | M4     | M5                | M7      | M11     | M12                  | M10     |
| <b>BIC</b>   |                  |       |       |                  |        |        |                   |         |         |                      |         |
| Median       | 8.06             | 8.07  | 15.70 | 121.63           | 196.22 | 447.21 | 163.16            | 1312.60 | 2687.59 | 25.46                | 2068.00 |
| IQR          | 1.11             | 1.17  | 2.04  | 31.16            | 39.14  | 60.01  | 38.34             | 109.78  | 155.93  | 11.49                | 121.84  |
| Median Rank  | 1                | 2     | 3     | 5                | 7      | 8      | 6                 | 9       | 11      | 4                    | 10      |
| <b>HBIC</b>  |                  |       |       |                  |        |        |                   |         |         |                      |         |
| Median       | 6.22             | 6.23  | 12.02 | 123.47           | 199.90 | 452.72 | 165.00            | 1312.60 | 2694.94 | 23.62                | 2071.68 |
| IQR          | 1.11             | 1.17  | 2.04  | 31.16            | 39.14  | 60.01  | 38.34             | 109.78  | 155.93  | 11.49                | 121.84  |
| Median Rank  | 1                | 2     | 3     | 5                | 7      | 8      | 6                 | 9       | 11      | 4                    | 10      |
| <b>IBIC</b>  |                  |       |       |                  |        |        |                   |         |         |                      |         |
| Median       | 15.96            | 13.46 | 29.01 | 116.34           | 185.59 | 430.90 | 160.86            | 1309.84 | 2660.40 | 32.08                | 2054.88 |
| IQR          | 1.12             | 1.18  | 2.02  | 31.11            | 39.06  | 59.65  | 38.18             | 109.94  | 155.54  | 11.39                | 121.79  |
| Median Rank  | 2                | 1     | 3     | 5                | 7      | 8      | 6                 | 9       | 11      | 4                    | 10      |
| <b>SPBIC</b> |                  |       |       |                  |        |        |                   |         |         |                      |         |
| Median       | 5.80             | 5.89  | 11.23 | 123.91           | 200.26 | 452.99 | 164.50            | 1315.53 | 2697.25 | 34.31                | 2067.51 |
| IQR          | 1.09             | 1.15  | 2.08  | 31.07            | 39.07  | 59.79  | 38.25             | 109.85  | 155.60  | 11.14                | 121.74  |
| Median Rank  | 1                | 2     | 3     | 5                | 7      | 8      | 6                 | 9       | 11      | 4                    | 10      |

*Note:* Cells report median and interquartile range (IQR) values of the fit statistics across the simulations, with median model ranks below. Lower numbers indicate better fit.

Table A.3: SIM2 Fit Statistic Quantiles and Median Ranks with No True Model ( $N = 100$ )

| Models:      | Extra Parameters |      |       | Dropped Loadings |       |       | Dropped and Extra |       |       | Dropped $\beta$ Only |       |
|--------------|------------------|------|-------|------------------|-------|-------|-------------------|-------|-------|----------------------|-------|
|              | M6               | M8   | M9    | M2               | M3    | M4    | M5                | M7    | M11   | M12                  | M10   |
| <b>BIC</b>   |                  |      |       |                  |       |       |                   |       |       |                      |       |
| Median       | 4.15             | 4.09 | 7.74  | -0.28            | -0.05 | 2.33  | 2.96              | 55.87 | 89.50 | 16.92                | 47.94 |
| IQR          | 1.43             | 1.30 | 2.59  | 5.70             | 8.25  | 10.95 | 8.35              | 22.77 | 31.00 | 7.22                 | 19.28 |
| Median Rank  | 4                | 4    | 7     | 3                | 2     | 3     | 4                 | 10    | 11    | 8                    | 9     |
| <b>HBIC</b>  |                  |      |       |                  |       |       |                   |       |       |                      |       |
| Median       | 2.31             | 2.25 | 4.07  | 1.55             | 3.63  | 7.84  | 4.80              | 55.87 | 96.85 | 11.40                | 51.61 |
| IQR          | 1.43             | 1.30 | 2.59  | 5.70             | 8.25  | 10.95 | 8.35              | 22.77 | 31.00 | 7.22                 | 19.28 |
| Median Rank  | 3                | 3    | 4     | 3                | 5     | 7     | 5                 | 10    | 11    | 8                    | 9     |
| <b>IBIC</b>  |                  |      |       |                  |       |       |                   |       |       |                      |       |
| Median       | 8.65             | 5.91 | 14.21 | -2.31            | -4.31 | -4.20 | 3.58              | 46.97 | 73.43 | 20.08                | 41.79 |
| IQR          | 1.31             | 1.33 | 2.41  | 5.28             | 7.49  | 9.95  | 7.52              | 19.24 | 28.90 | 7.23                 | 18.82 |
| Median Rank  | 6                | 5    | 7     | 3                | 2     | 2     | 4                 | 10    | 11    | 8                    | 9     |
| <b>SPBIC</b> |                  |      |       |                  |       |       |                   |       |       |                      |       |
| Median       | 1.76             | 1.91 | 3.18  | 2.36             | 5.82  | 10.88 | 6.49              | 55.91 | 95.10 | 18.35                | 43.63 |
| IQR          | 1.32             | 1.22 | 2.37  | 5.97             | 8.81  | 11.40 | 8.75              | 20.01 | 31.05 | 7.97                 | 17.11 |
| Median Rank  | 2                | 2    | 4     | 4                | 5     | 7     | 6                 | 10    | 11    | 8                    | 9     |

*Note:* Cells report median and interquartile range (IQR) values of the fit statistics across the simulations, with median model ranks below. Lower numbers indicate better fit.

Table A.4: SIM2 Fit Statistic Quantiles and Median Ranks with No True Model ( $N = 250$ )

| Models:      | Extra Parameters |      |       | Dropped Loadings |       |       | Dropped and Extra |        |        | Dropped $\beta$ Only |        |
|--------------|------------------|------|-------|------------------|-------|-------|-------------------|--------|--------|----------------------|--------|
|              | M6               | M8   | M9    | M2               | M3    | M4    | M5                | M7     | M11    | M12                  | M10    |
| <b>BIC</b>   |                  |      |       |                  |       |       |                   |        |        |                      |        |
| Median       | 5.05             | 5.06 | 9.60  | 5.34             | 10.94 | 21.07 | 13.62             | 140.89 | 242.75 | 30.00                | 130.44 |
| IQR          | 1.18             | 1.26 | 2.16  | 9.48             | 13.54 | 17.12 | 13.28             | 34.59  | 49.85  | 12.51                | 30.45  |
| Median Rank  | 2                | 2    | 4     | 3                | 5     | 7     | 6                 | 10     | 11     | 8                    | 9      |
| <b>HBIC</b>  |                  |      |       |                  |       |       |                   |        |        |                      |        |
| Median       | 3.21             | 3.22 | 5.92  | 7.18             | 14.61 | 26.58 | 15.46             | 140.89 | 250.10 | 24.49                | 134.11 |
| IQR          | 1.18             | 1.26 | 2.16  | 9.48             | 13.54 | 17.12 | 13.28             | 34.59  | 49.85  | 12.51                | 30.45  |
| Median Rank  | 2                | 2    | 3     | 4                | 5     | 7     | 6                 | 10     | 11     | 7                    | 9      |
| <b>IBIC</b>  |                  |      |       |                  |       |       |                   |        |        |                      |        |
| Median       | 10.49            | 7.87 | 17.98 | 2.40             | 4.72  | 11.88 | 13.18             | 132.71 | 223.22 | 35.82                | 122.17 |
| IQR          | 1.11             | 1.16 | 2.13  | 9.19             | 12.84 | 16.63 | 12.42             | 33.26  | 48.60  | 11.74                | 30.30  |
| Median Rank  | 4                | 3    | 7     | 2                | 2     | 5     | 5                 | 10     | 11     | 8                    | 9      |
| <b>SPBIC</b> |                  |      |       |                  |       |       |                   |        |        |                      |        |
| Median       | 2.69             | 2.80 | 4.99  | 8.22             | 16.68 | 29.52 | 16.99             | 139.93 | 249.17 | 31.08                | 125.98 |
| IQR          | 1.19             | 1.19 | 2.06  | 9.59             | 13.29 | 17.68 | 13.19             | 33.19  | 49.76  | 11.84                | 29.17  |
| Median Rank  | 2                | 2    | 3     | 4                | 5     | 7     | 6                 | 10     | 11     | 8                    | 9      |

*Note:* Cells report median and interquartile range (IQR) values of the fit statistics across the simulations, with median model ranks below. Lower numbers indicate better fit.

Table A.5: SIM2 Fit Statistic Quantiles and Median Ranks with No True Model ( $N = 500$ )

| Models:      | Extra Parameters |      |       | Dropped Loadings |       |       | Dropped and Extra |        |        | Dropped $\beta$ Only |        |  |
|--------------|------------------|------|-------|------------------|-------|-------|-------------------|--------|--------|----------------------|--------|--|
|              | M6               | M8   | M9    | M2               | M3    | M4    | M5                | M7     | M11    | M12                  | M10    |  |
| <b>BIC</b>   |                  |      |       |                  |       |       |                   |        |        |                      |        |  |
| Median       | 5.79             | 5.76 | 11.11 | 15.95            | 29.33 | 52.74 | 32.18             | 285.49 | 503.97 | 48.88                | 264.15 |  |
| IQR          | 1.13             | 1.12 | 2.05  | 13.26            | 18.43 | 23.66 | 18.41             | 51.06  | 73.84  | 17.35                | 46.78  |  |
| Median Rank  | 2                | 2    | 3     | 4                | 5     | 8     | 6                 | 10     | 11     | 7                    | 9      |  |
| <b>HBIC</b>  |                  |      |       |                  |       |       |                   |        |        |                      |        |  |
| Median       | 3.95             | 3.92 | 7.43  | 17.78            | 33.01 | 58.26 | 34.02             | 285.49 | 511.32 | 43.37                | 267.82 |  |
| IQR          | 1.13             | 1.12 | 2.05  | 13.26            | 18.43 | 23.66 | 18.41             | 51.06  | 73.84  | 17.35                | 46.78  |  |
| Median Rank  | 2                | 2    | 3     | 4                | 6     | 8     | 6                 | 10     | 11     | 7                    | 9      |  |
| <b>IBIC</b>  |                  |      |       |                  |       |       |                   |        |        |                      |        |  |
| Median       | 11.92            | 9.30 | 20.85 | 12.25            | 21.85 | 41.59 | 31.13             | 277.34 | 481.61 | 56.93                | 254.34 |  |
| IQR          | 1.11             | 1.11 | 2.03  | 13.18            | 18.07 | 23.42 | 18.31             | 49.66  | 72.38  | 17.06                | 46.56  |  |
| Median Rank  | 2                | 1    | 4     | 3                | 5     | 7     | 6                 | 10     | 11     | 8                    | 9      |  |
| <b>SPBIC</b> |                  |      |       |                  |       |       |                   |        |        |                      |        |  |
| Median       | 3.36             | 3.49 | 6.43  | 18.78            | 35.23 | 61.51 | 35.66             | 284.42 | 510.78 | 49.74                | 259.39 |  |
| IQR          | 1.12             | 1.11 | 2.07  | 13.40            | 18.61 | 23.77 | 18.72             | 49.56  | 73.51  | 17.13                | 45.54  |  |
| Median Rank  | 1                | 2    | 3     | 4                | 6     | 8     | 6                 | 10     | 11     | 7                    | 9      |  |

Note: Cells report median and interquartile range (IQR) values of the fit statistics across the simulations, with median model ranks below. Lower numbers indicate better fit.



Table A.6: SIM2 Fit Statistic Quantiles and Median Ranks with No True Model ( $N = 1000$ )

| Models:      | Extra Parameters |       |       | Dropped Loadings |       |        | Dropped and Extra |        |         | Dropped $\beta$ Only |        |
|--------------|------------------|-------|-------|------------------|-------|--------|-------------------|--------|---------|----------------------|--------|
|              | M6               | M8    | M9    | M2               | M3    | M4     | M5                | M7     | M11     | M12                  | M10    |
| <b>BIC</b>   |                  |       |       |                  |       |        |                   |        |         |                      |        |
| Median       | 6.43             | 6.36  | 12.26 | 38.30            | 71.26 | 122.24 | 70.98             | 574.86 | 1031.76 | 85.87                | 539.21 |
| IQR          | 1.32             | 1.26  | 2.25  | 18.49            | 25.31 | 33.76  | 25.81             | 71.06  | 102.38  | 23.84                | 65.43  |
| Median Rank  | 2                | 1     | 3     | 4                | 6     | 8      | 6                 | 10     | 11      | 7                    | 9      |
| <b>HBIC</b>  |                  |       |       |                  |       |        |                   |        |         |                      |        |
| Median       | 4.59             | 4.52  | 8.59  | 40.14            | 74.94 | 127.76 | 72.82             | 574.86 | 1039.11 | 80.36                | 542.88 |
| IQR          | 1.32             | 1.26  | 2.25  | 18.49            | 25.31 | 33.76  | 25.81             | 71.06  | 102.38  | 23.84                | 65.43  |
| Median Rank  | 2                | 1     | 3     | 4                | 6     | 8      | 6                 | 10     | 11      | 6                    | 9      |
| <b>IBIC</b>  |                  |       |       |                  |       |        |                   |        |         |                      |        |
| Median       | 13.24            | 10.62 | 23.38 | 33.90            | 62.38 | 108.75 | 69.11             | 566.65 | 1006.68 | 95.79                | 528.40 |
| IQR          | 1.32             | 1.31  | 2.25  | 18.38            | 25.20 | 33.57  | 25.53             | 70.10  | 101.66  | 23.81                | 65.16  |
| Median Rank  | 2                | 1     | 3     | 4                | 5     | 8      | 6                 | 10     | 11      | 7                    | 9      |
| <b>SPBIC</b> |                  |       |       |                  |       |        |                   |        |         |                      |        |
| Median       | 4.01             | 4.09  | 7.58  | 41.07            | 77.26 | 130.55 | 74.28             | 573.69 | 1038.86 | 86.47                | 535.21 |
| IQR          | 1.30             | 1.27  | 2.24  | 18.53            | 25.67 | 33.83  | 26.06             | 70.11  | 102.20  | 23.64                | 64.71  |
| Median Rank  | 1                | 2     | 3     | 4                | 6     | 8      | 6                 | 10     | 11      | 7                    | 9      |

*Note:* Cells report median and interquartile range (IQR) values of the fit statistics across the simulations, with median model ranks below. Lower numbers indicate better fit.

Table A.7: SIM2 Fit Statistic Quantiles and Median Ranks with No True Model ( $N = 5000$ )

| Models:      | Extra Parameters |       |       | Dropped Loadings |        |        | Dropped and Extra |         |         | Dropped $\beta$ Only |         |
|--------------|------------------|-------|-------|------------------|--------|--------|-------------------|---------|---------|----------------------|---------|
|              | M6               | M8    | M9    | M2               | M3     | M4     | M5                | M7      | M11     | M12                  | M10     |
| <b>BIC</b>   |                  |       |       |                  |        |        |                   |         |         |                      |         |
| Median       | 8.07             | 8.11  | 15.74 | 217.41           | 407.71 | 680.70 | 377.48            | 2873.99 | 5265.19 | 366.31               | 2754.49 |
| IQR          | 1.19             | 1.19  | 2.25  | 40.31            | 59.62  | 78.59  | 57.01             | 162.95  | 224.78  | 50.38                | 128.37  |
| Median Rank  | 1                | 2     | 3     | 4                | 7      | 8      | 6                 | 10      | 11      | 5                    | 9       |
| <b>HBIC</b>  |                  |       |       |                  |        |        |                   |         |         |                      |         |
| Median       | 6.24             | 6.28  | 12.07 | 219.25           | 411.39 | 686.21 | 379.31            | 2873.99 | 5272.54 | 360.80               | 2758.17 |
| IQR          | 1.19             | 1.19  | 2.25  | 40.31            | 59.62  | 78.59  | 57.01             | 162.95  | 224.78  | 50.38                | 128.37  |
| Median Rank  | 1                | 2     | 3     | 4                | 7      | 8      | 6                 | 10      | 11      | 5                    | 9       |
| <b>IBIC</b>  |                  |       |       |                  |        |        |                   |         |         |                      |         |
| Median       | 16.48            | 14.00 | 30.01 | 211.36           | 395.43 | 662.42 | 373.82            | 2865.70 | 5233.53 | 381.35               | 2740.30 |
| IQR          | 1.20             | 1.14  | 2.25  | 40.31            | 59.49  | 78.44  | 56.94             | 162.39  | 224.39  | 50.35                | 128.38  |
| Median Rank  | 2                | 1     | 3     | 4                | 6      | 8      | 6                 | 10      | 11      | 6                    | 9       |
| <b>SPBIC</b> |                  |       |       |                  |        |        |                   |         |         |                      |         |
| Median       | 5.66             | 5.83  | 11.03 | 220.22           | 413.58 | 689.05 | 380.68            | 2872.47 | 5272.02 | 366.78               | 2750.09 |
| IQR          | 1.21             | 1.18  | 2.22  | 40.33            | 59.66  | 78.43  | 56.91             | 162.52  | 225.05  | 50.30                | 128.34  |
| Median Rank  | 1                | 2     | 3     | 4                | 7      | 8      | 6                 | 10      | 11      | 5                    | 9       |

*Note:* Cells report median and interquartile range (IQR) values of the fit statistics across the simulations, with median model ranks below. Lower numbers indicate better fit.

### BIC

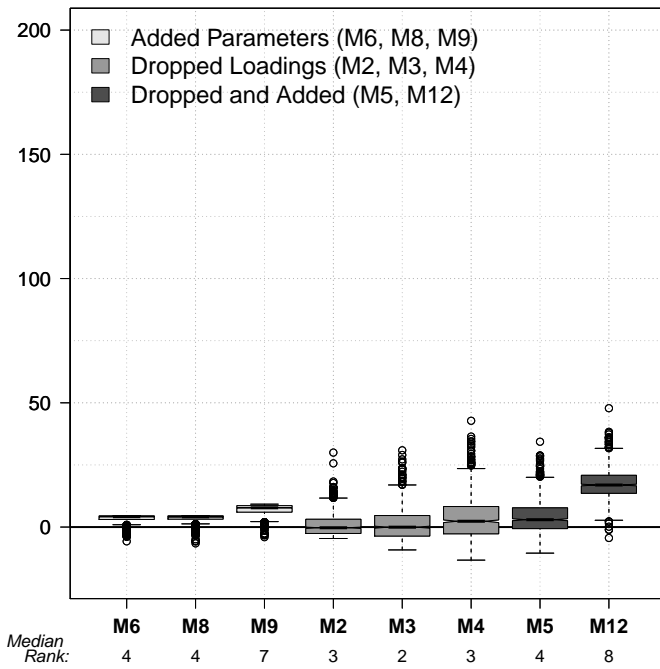

### HBIC

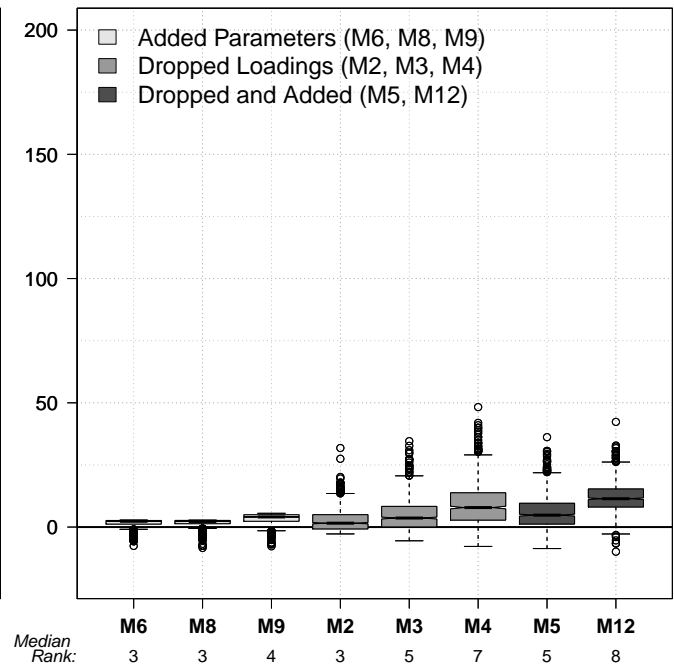

### IBIC

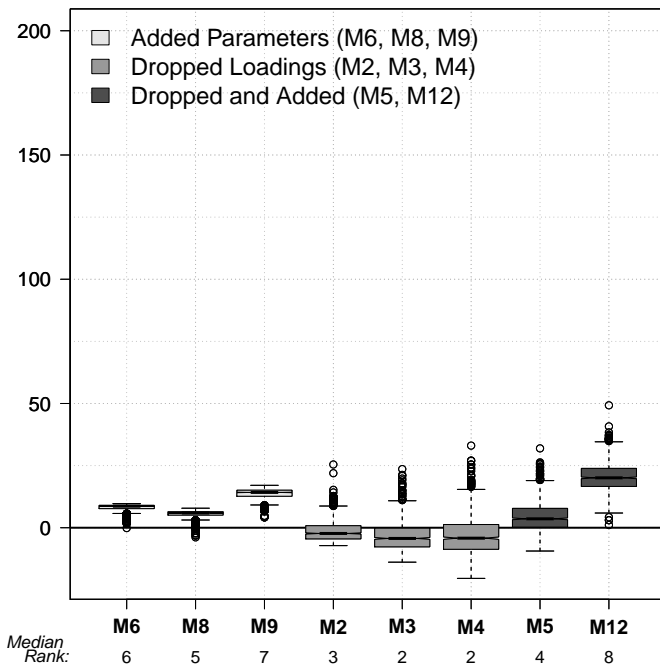

### SPBIC

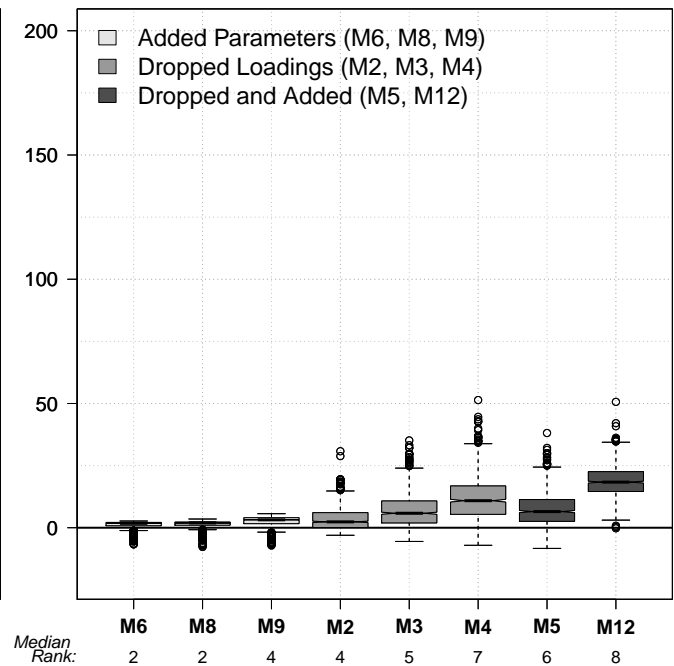

Figure A.3: SIM2 IC Box-and-Whisker Plots and Median Ranks with No True Model ( $N = 100$ ). Box-and-Whisker plots represent each fit statistic for each model over the 1,000 simulations. Numbers below the model names represent the median rank of each fit statistic for each model over the 1000 simulations.

### BIC

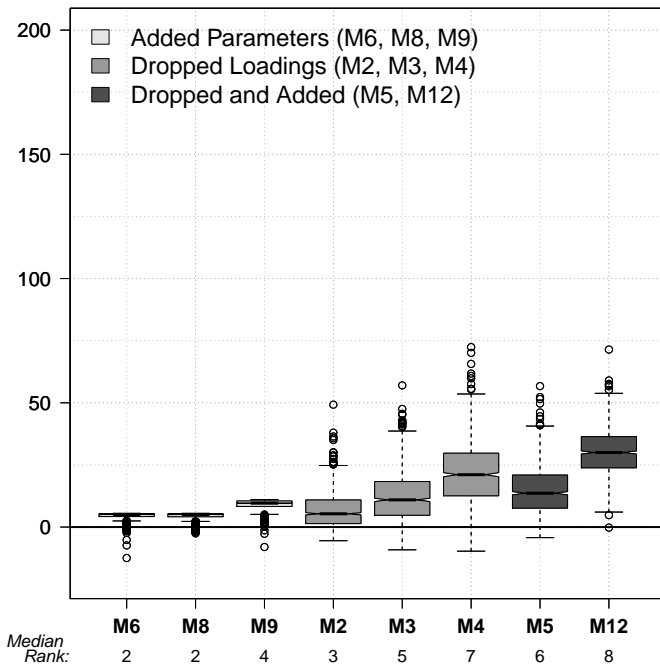

### HBIC

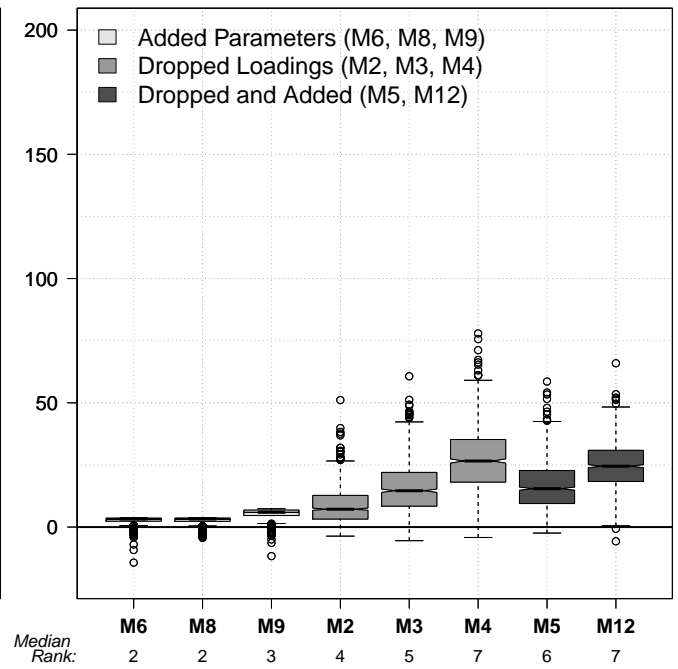

### IBIC

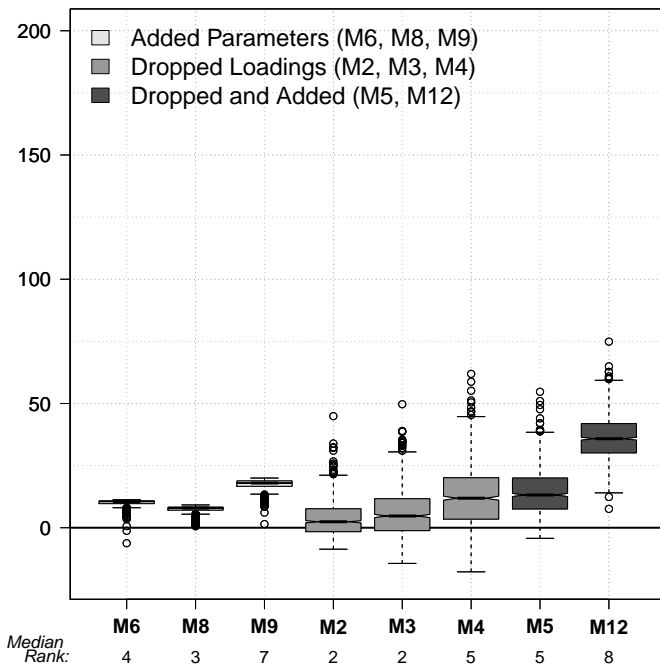

### SPBIC

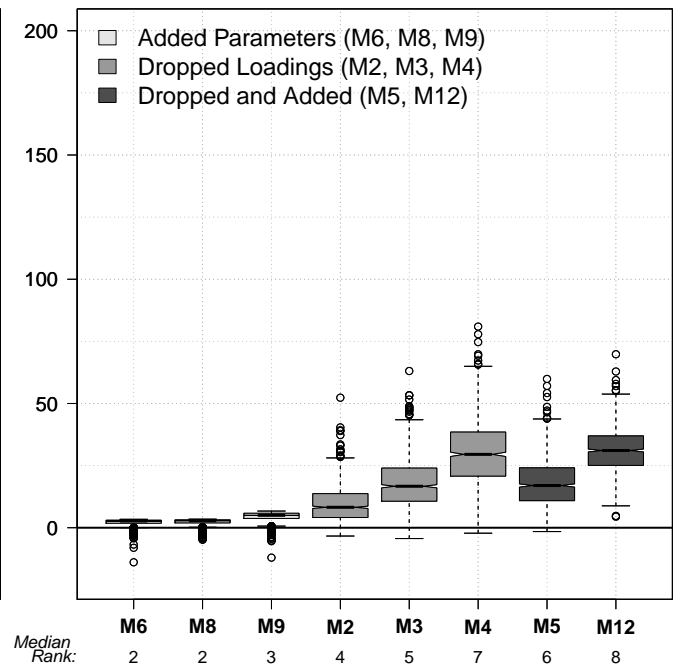

Figure A.4: SIM2 IC Box-and-Whisker Plots and Median Ranks with No True Model ( $N = 250$ ). Box-and-Whisker plots represent each fit statistic for each model over the 1,000 simulations. Numbers below the model names represent the median rank of each fit statistic for each model over the 1000 simulations.

### BIC

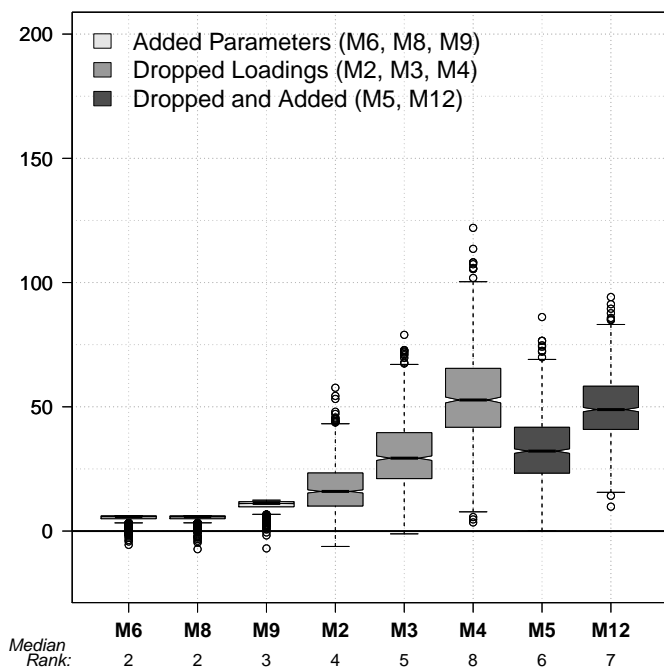

### HBIC

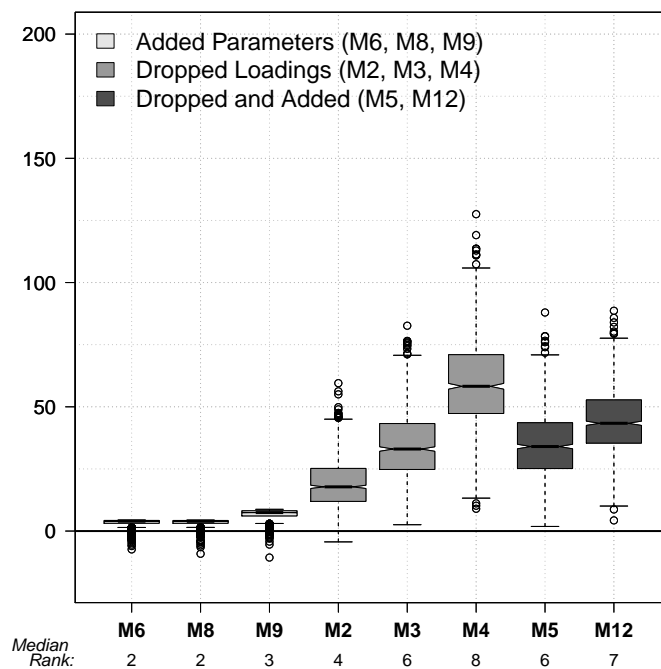

### IBIC

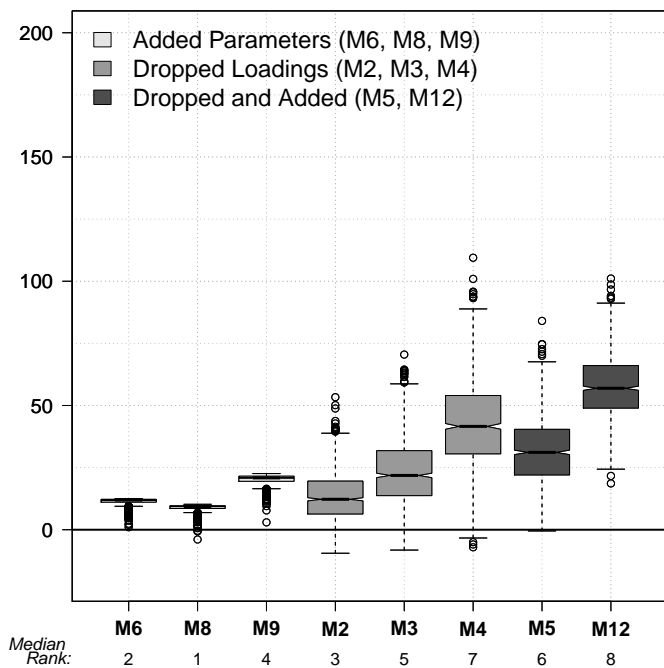

### SPBIC

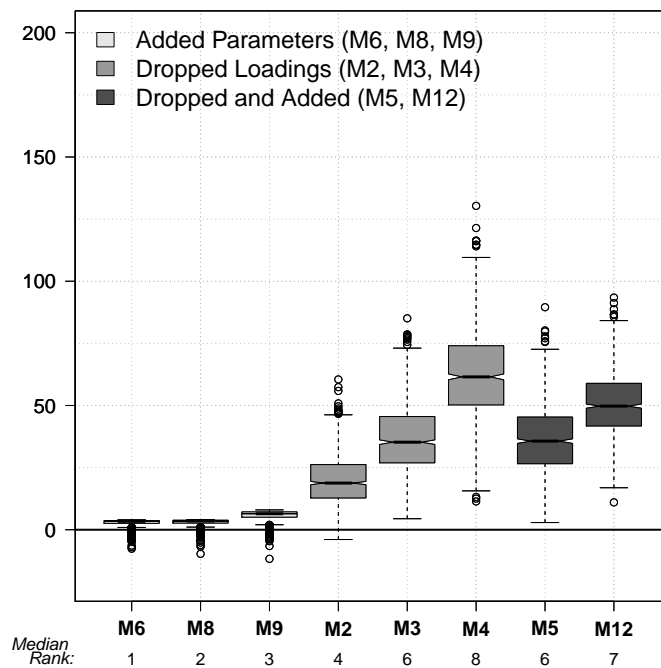

Figure A.5: SIM2 IC Box-and-Whisker Plots and Median Ranks with No True Model ( $N = 500$ ). Box-and-Whisker plots represent each fit statistic for each model over the 1,000 simulations. Numbers below the model names represent the median rank of each fit statistic for each model over the 1000 simulations.

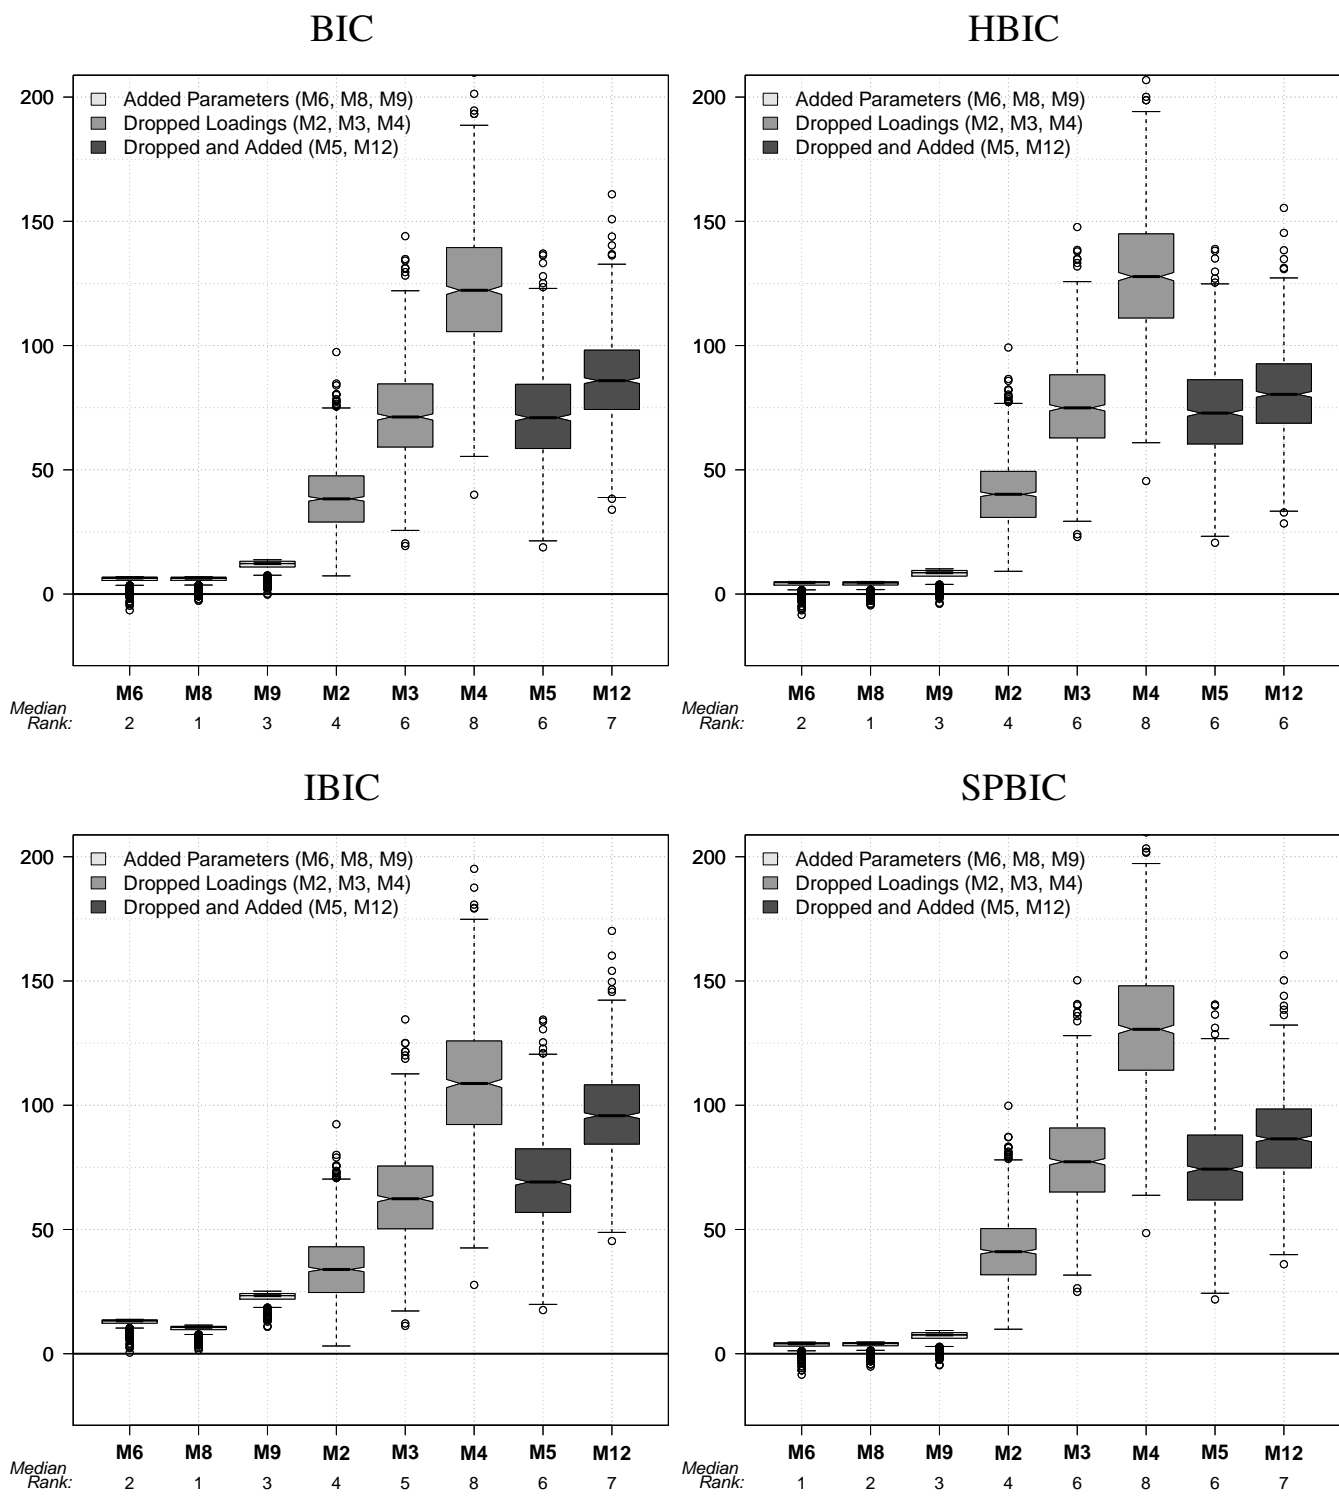

Figure A.6: SIM2 IC Box-and-Whisker Plots and Median Ranks with No True Model ( $N = 1000$ ). Box-and-Whisker plots represent each fit statistic for each model over the 1,000 simulations. Numbers below the model names represent the median rank of each fit statistic for each model over the 1000 simulations.

## References

Kashyap, R. L. (1982). Optimal choice of ar and ma parts in autoregressive moving average models. *IEEE Transactions on Pattern Analysis and Machine Intelligence*, 4(2):99–104.
